# Supplementary material
Source: publisher figshare collection journal article supplement (https://karger.figshare.com/articles/dataset/_/3482291)
Supplement: Supplementary file 1 [file 1]

Supplementary Table 1: Comparison between studied male and female subjects with regard to AR expression

| Variable      | Sun unprotected skin |           |                |       | Sun protected skin |            |                |       |
|---------------|----------------------|-----------|----------------|-------|--------------------|------------|----------------|-------|
|               | Epidermis            |           |                |       |                    |            |                |       |
|               | Males                | Females   | X <sup>2</sup> | P     | Males              | Females    | X <sup>2</sup> | P     |
|               | No(%)                | No(%)     |                |       | No(%)              | No(%)      |                |       |
| Keratinocytes |                      |           |                |       |                    |            | #              |       |
| Positive      | 32(82.1)             | 13(61.9)  | 2.9            | 0.09  | 37(94.9)           | 19(90.5)   | 0.42           | 0.6   |
| Negative      | 7(17.9)              | 8(38.1)   |                |       | 2(5.1)             | 2(9.5)     |                |       |
| Pattern       |                      |           | #              |       |                    |            |                |       |
| Cytoplasmic   | 30(93.8)             | 10(76.9)  | 2.6            | 0.1   | 27 (73)            | 14(73.7)   | 0.003          | 0.9   |
| Cytonuclear   | 2(6.2)               | 3(23.1)   |                |       | 10(27)             | 5(26.3)    |                |       |
| Intensity     |                      |           |                |       |                    |            |                |       |
| Mild          | 14(43.8)             | 6(46.2)   | 0.02           | 0.8   | 5(13.5)            | 3(15.8)    | 2.49           | 0.2   |
| Moderate      | 18(56.2)             | 7(53.8)   |                |       | 24(64.9)           | 15(78.9)   |                |       |
|               |                      |           |                |       | 8(21.6)            | 1(5.3)     |                |       |
| Percent       | 66.9±17.5            | 51.5±25.4 | U              |       |                    |            | U              |       |
| X ±SD         | 30 – 90              | 20 – 90   | 1.8            | 0.06  | 74.1±14.9          | 73.2±16.0  | 0.19           | 0.8   |
| Range         |                      |           |                |       | 30 – 90            | 30 – 90    |                |       |
| H score       | 104.1±43.0           | 83.1±52.2 | U              |       |                    |            | U              |       |
| X ±SD         | 40 – 180             | 20 – 160  | 1.2            | 0.2   | 154.6±51.1         | 138.9±50.1 | 1.38           | 0.1   |
| Range         |                      |           |                |       | 30 – 270           | 60 – 270   |                |       |
|               | Dermis               |           |                |       |                    |            |                |       |
|               | No(%)                | No(%)     | test           | P     | No(%)              | No(%)      | test           | P     |
| Endothelium   |                      |           |                |       |                    |            |                |       |
| Positive      | 0(0)                 | 0(0)      | ---            | ----- | 0(0)               | 0(0)       | ---            | ----- |
| Negative      | 39(100)              | 21(100)   |                |       | 39(100)            | 21(100)    |                |       |

|                         |          |         |     |      |          |          |      |      |
|-------------------------|----------|---------|-----|------|----------|----------|------|------|
| <b>Fibroblasts</b>      |          |         |     |      |          |          |      |      |
| Positive                | 0(0)     | 0(0)    | --- | ---- | 0(0)     | 0(0)     | ---  | ---- |
| Negative                | 39(100)  | 21(100) |     |      | 39(100)  | 21(100)  |      |      |
| <b>Sweat glands</b>     | N=30     | N=17    |     |      | N=32     | N=18     |      |      |
| Positive                | 0(0)     | 0(0)    | --- | ---- | 0(0)     | 0(0)     | ---  | ---- |
| Negative                | 30(100)  | 17(100) |     |      | 32(100)  | 18(100)  |      |      |
| <b>Hair follicles</b>   | No= 29   | No= 15  | #   |      | N = 30   | N = 17   | #    |      |
| Positive                | 2(6.9)   | 3(20)   | 1.6 | 0.3  | 2(6.7)   | 2(11.8)  | 0.36 | 0.6  |
| Negative                | 27(93.1) | 12(80)  |     |      | 28(93.3) | 15(88.2) |      |      |
| <b>Sebaceous glands</b> | No= 27   | No= 14  | #   |      | N = 27   | N = 16   | #    |      |
| Positive                | 4(14.8)  | 0(0)    | 2.3 | 0.2  | 8(29.6)  | 0(0)     | 5.82 | 0.02 |
| Negative                | 23(85.2) | 14(100) |     |      | 19(70.4) | 16(100)  |      |      |

X ± SD: mean ± standard deviation, X<sup>2</sup>: Chi square test, U: Mann-Whitney test, #: Fisher Exact test

Supplementary Table 2: Comparison between studied male and female subjects with regard to ER $\beta$  expression

| Variable      | Sun  unprotected skin |             |                |       | Sun protected skin |              |                |       |
|---------------|-----------------------|-------------|----------------|-------|--------------------|--------------|----------------|-------|
|               | Epidermis             |             |                |       |                    |              |                |       |
|               | Males                 | Females     | X <sup>2</sup> | P     | Males              | Females      | X <sup>2</sup> | P     |
|               | No(%)                 | No(%)       |                |       | No(%)              | No(%)        |                |       |
| Keratinocytes |                       |             | #              |       |                    |              |                |       |
| Positive      | 35(89.7)              | 19(90.5)    | 0.0            | 1.0   | 37(94.9)           | 19 (90.5)    | 0.42           | 0.61  |
| Negative      | 4(10.3)               | 2(9.5)      | 08             |       | 2(5.1)             | 2(9.5)       |                |       |
| Pattern       |                       |             |                |       |                    |              |                |       |
| Cytoplasmic   | 25(71.4)              | 11(57.9)    | 1.0            | 0.31  | 14(37.8)           | 7(36.8)      | 0.005          | 0.94  |
| Cytonuclear   | 17(28.6)              | 8(42.1)     | 2              |       | 23(62.2)           | 12(63.2)     |                |       |
| Intensity     |                       |             |                |       |                    |              |                |       |
| Mild          | 14(40)                | 5(26.3)     |                | 0.36  | 6(16.2)            | 3(15.8)      | 0.69           | 0.71  |
| Moderate      | 19(54.3)              | 11(57.9)    | 2.6            |       | 23(62.2)           | 10(52.6)     |                |       |
|               | 2(5.7)                | 3(15.8)     |                |       | 8(21.6)            | 6(31.6)      |                |       |
| Percent       |                       |             | U              |       |                    |              | U              |       |
| X ±SD         | 56.57±23.19           | 54.21±22.50 | 0.4            | 0.64  | 67.03±20.06        | 66.58±16.92  | 0.41           | 0.68  |
| Range         | 10 – 90               | 15 – 90     |                |       | 30 – 95            | 30 – 90      |                |       |
| H score       |                       |             | U              |       |                    |              | U              |       |
| X ±SD         | 100.57±64.82          | 107.11±71.8 | 0.3            | 0.73  | 141.62±68.3        | 151.05±68.97 | 0.37           | 0.71  |
| Range         | 20 – 240              | 20 – 270    |                |       | 30 – 270           | 60 – 270     |                |       |
|               | Dermis                |             |                |       |                    |              |                |       |
|               | No(%)                 | No(%)       | test           | P     | No(%)              | No(%)        | Test           | P     |
| Endothelium   |                       |             |                |       |                    |              |                |       |
| Positive      | 0(0)                  | 0(0)        | ---            | ----- | 0(0)               | 0(0)         | -----          | ----- |
| Negative      | 39(100)               | 21(100)     |                |       | 39(100)            | 21(100)      |                |       |
| Fibroblasts   |                       |             | #              |       |                    |              | #              |       |
| Positive      | 2(5.1)                | 1(4.8)      | 0.4            | 1.0   | 3(7.7)             | 2(9.5)       | 0.06           | 1.0   |

|                         |          |          |      |     |          |          |      |      |
|-------------------------|----------|----------|------|-----|----------|----------|------|------|
| Negative                | 37(94.9) | 20(95.2) |      |     | 36(92.3) | 19(90.5) |      |      |
| <b>Sweat glands</b>     | N=24     | N=12     | #    |     | N=19     | N=12     | #    |      |
| Positive                | 2(8.3)   | 1(8.3)   | 0.0  | 1.0 | 2(10.5)  | 1(8.3)   | 0.04 | 1.0  |
| Negative                | 22(91.7) | 11(91.7) |      |     | 17(89.5) | 11(91.7) |      |      |
| <b>Hair follicles</b>   | N=22     | N=12     | #    |     | N=20     | N=10     | #    |      |
| Positive                | 3(13.6)  | 2(16.7)  | 0.06 | 1.0 | 4(20)    | 1(10)    | 0.48 | 0.64 |
| Negative                | 19(86.4) | 10(83.3) |      |     | 16(80)   | 9(90)    |      |      |
| <b>Sebaceous glands</b> | N=11     | N=6      | #    |     | N=13     | N=7      | #    |      |
| Positive                | 1(9.1)   | 0(0)     | 0.58 | 1.0 | 4(30.8)  | 1(14.3)  | 0.66 | 0.61 |
| Negative                | 10(90.9) | 6(100)   |      |     | 9(69.2)  | 6(85.7)  |      |      |

X ± SD: mean ± standard deviation, X<sup>2</sup>: Chi square test, U: Mann-Whitney test, #: Fisher Exact test
